# Supplementary material
Source: MDPI journal article supplement (https://www.mdpi.com/2073-4468/10/4/39)
Supplement: s1 [file s1]

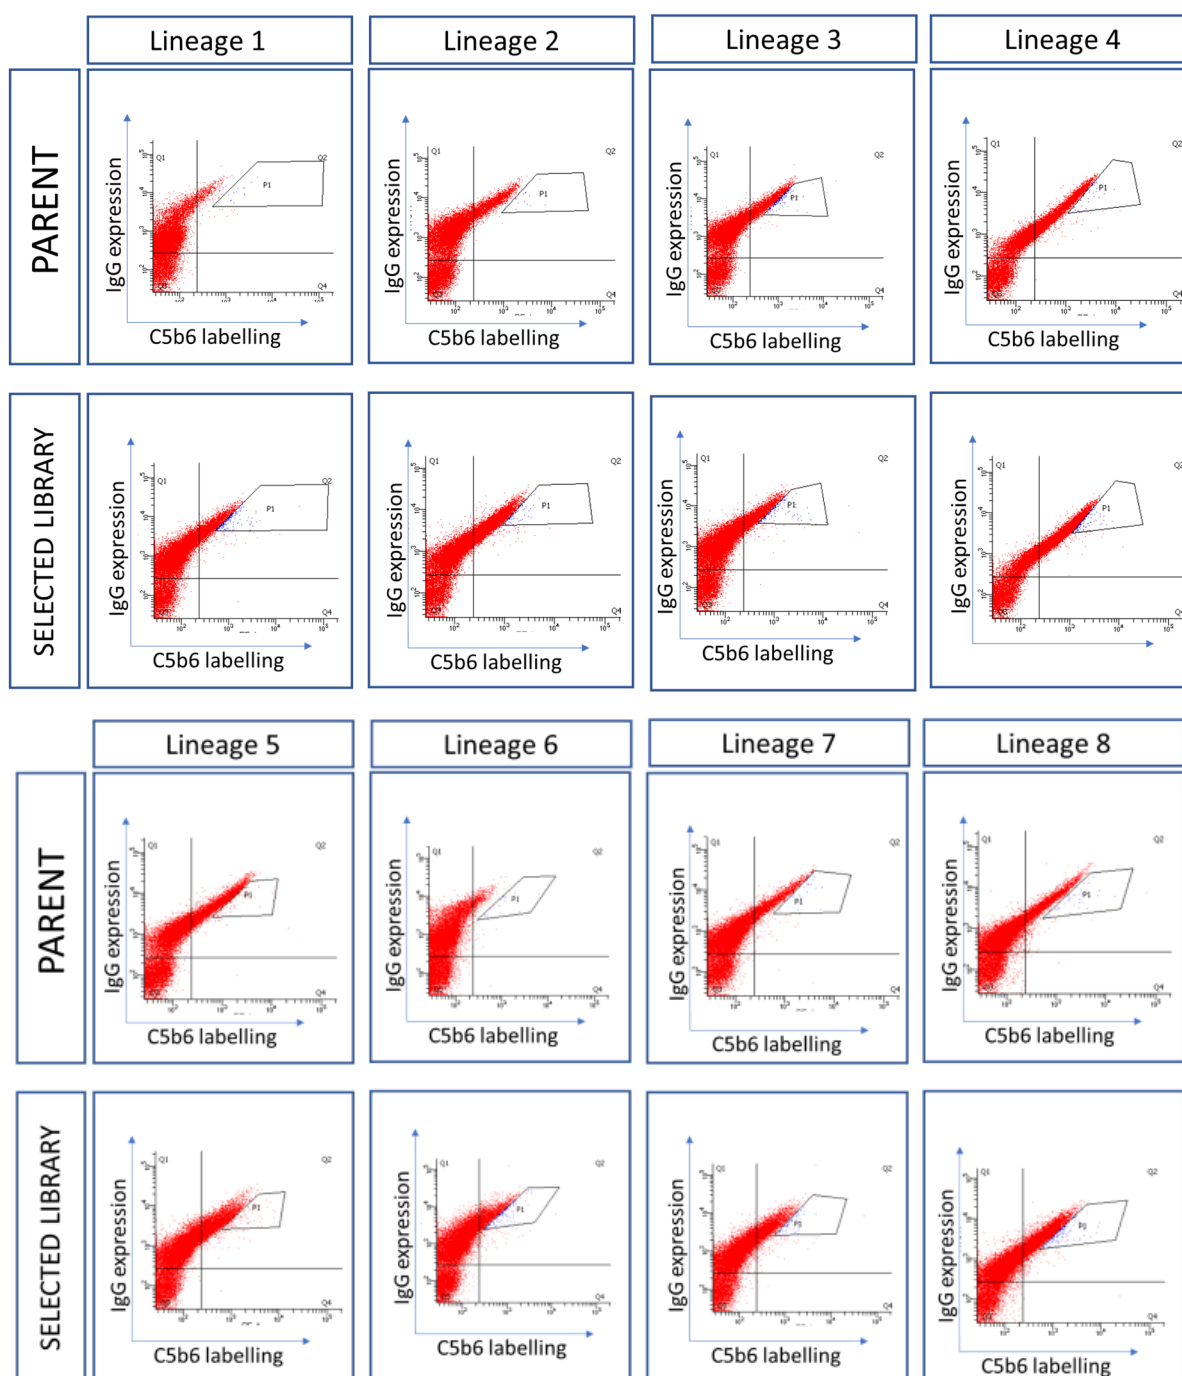

**Supplementary Figure S1:** Final round of CDRH1/CDRH2 diversified affinity maturation selections. The plots show the selected libraries compared with their corresponding parents. The gates drawn show ~0.1% of the selected library which were sorted prior to daughter clone expression. Six of the eight libraries show improved binding over parent, with lineages 3 and 5 showing no discernible improvement.

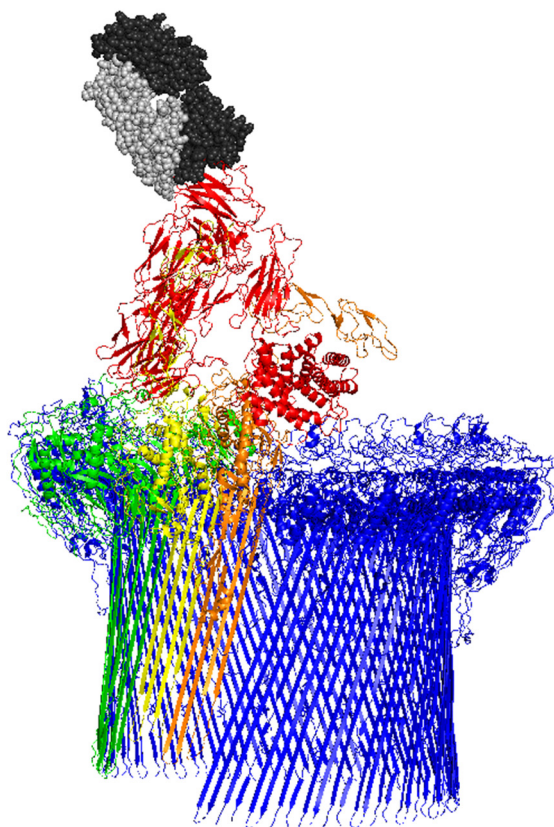

**Supplementary Figure S2:** Model of membrane attack complex (PDB: 6H04) and anti-C5 antibody (PDB: 5I5K) in complex with C5. Composite model generated and visualised using PyMol using structure of MAC (PDB: 6H04) and anti-C5 Fab in complex with C5 (PDB: 5I5K), by aligning both structures on the C5 chain. C5 (red), C6, (orange), C7 (yellow), C8 (green), C9 (blue), anti-C5 heavy chain (dark grey), anti-C5 light chain (light grey).
